# Supplementary material
Source: PubMed Central journal article supplement (PMC6689327)
Supplement: NIHMS1531877-supplement-1.pdf [file NIHMS1531877-supplement-1.pdf]

## Supplemental Methods

Primary reason for visit codes and labels used to identify specific symptoms for **Table 1**.

| Rank | Symptoms                  | Primary reason for visit code | Primary reason for visit label            |
|------|---------------------------|-------------------------------|-------------------------------------------|
| 1    | Abdominal pain            | 15450                         | Stomach and abdominal pain, cramps an...  |
|      |                           | 15451                         | Abdominal pain, cramps, spasms, NOS       |
|      |                           | 15452                         | Lower abdominal pain, cramps, spasms, ... |
|      |                           | 15453                         | Upper abdominal pain, cramps, spasms...   |
| 2    | Vomiting                  | 15300                         | Vomiting                                  |
| 3    | Diarrhea                  | 15950                         | Diarrhea                                  |
| 4    | Nausea                    | 15250                         | Nausea                                    |
| 5    | Bleeding                  | 15800                         | Gastrointestinal bleeding                 |
|      |                           | 15801                         | Blood in stool (melena)                   |
|      |                           | 15802                         | Vomiting blood (hematemesis)              |
|      |                           | 16052                         | Anal-rectal bleeding                      |
| 6    | Constipation              | 15900                         | Constipation                              |
| 7    | Anorectal symptoms        | 16050                         | Symptoms referable to anus-rectum         |
|      |                           | 16051                         | Anal-rectal pain                          |
|      |                           | 16053                         | Anal-rectal swelling or mass              |
|      |                           | 16054                         | Anal-rectal itching                       |
|      |                           | 16004                         | Incontinence of stool                     |
| 8    | Heartburn and indigestion | 15350                         | Heartburn and indigestion (dyspepsia)     |
| 9    | Decreased appetite        | 15702                         | Decreased appetite                        |
| 10   | Dysphagia                 | 15200                         | Difficulty in swallowing (dysphagia)      |

ICD-9 codes used to identify specific diagnoses for **Table 2**.

| <b>Diagnosis</b>                          | <b>ICD-9 Diagnosis Codes</b>                         |
|-------------------------------------------|------------------------------------------------------|
| Abdominal pain                            | 789.00                                               |
| GERD and reflux esophagitis               | 530.11, 530.81                                       |
| Hemorrhoids                               | 455                                                  |
| Constipation                              | 564.0                                                |
| Nausea and vomiting                       | 787.0                                                |
| Abdominal wall and inguinal hernia        | 550, 553.0, 553.1, 553.2, 553.9                      |
| Malignant neoplasm of the colon or rectum | 153, 154                                             |
| Diverticular disease of the colon         | 562.1                                                |
| Diarrhea                                  | 787.91                                               |
| Gastritis and dyspepsia                   | 535, 536.8                                           |
| Irritable bowel                           | 564.1                                                |
| Crohn's disease                           | 555                                                  |
| Cholelithiasis                            | 574                                                  |
| Dysphagia                                 | 787.2                                                |
| Lower GI hemorrhage                       | 562.02, 562.03, 562.12, 562.13, 569.85, 569.3, 578.1 |
| Benign neoplasm of colon and rectum       | 211.3, 211.4                                         |
| Pancreatitis - acute and chronic          | 577, 577.1                                           |
| Ulcerative colitis                        | 556                                                  |
| Hepatitis C infection                     | 070.41, 070.44, 070.51, 070.54, 070.7                |
| Appendicitis                              | 540, 541, 542                                        |
| Hepatitis, unspecified                    | 573.3                                                |
| Chronic liver disease and cirrhosis       | 571                                                  |
| Barrett's esophagus                       | 530.85                                               |
| Celiac disease                            | 579.0                                                |

ICD-9 codes used to identify specific diagnoses for **Tables 3 and 4**.

| <b>Gastrointestinal disease</b>   | <b>ICD-9-CM codes</b>                                                                                                                                                                                                                                                                           |
|-----------------------------------|-------------------------------------------------------------------------------------------------------------------------------------------------------------------------------------------------------------------------------------------------------------------------------------------------|
| Abdominal pain                    | 789.00 – 789.09, 789.6-789.7                                                                                                                                                                                                                                                                    |
| Pancreatitis                      | 577.0, 577.1                                                                                                                                                                                                                                                                                    |
| Acute pancreatitis                | 577.0                                                                                                                                                                                                                                                                                           |
| Chronic pancreatitis              | 577.1                                                                                                                                                                                                                                                                                           |
| Appendicitis                      | 540-542                                                                                                                                                                                                                                                                                         |
| C. difficile infection            | 008.45                                                                                                                                                                                                                                                                                          |
| Cholelithiasis and cholecystitis  | 574, 575.0-575.2                                                                                                                                                                                                                                                                                |
| Chronic pancreatitis              | 577.1                                                                                                                                                                                                                                                                                           |
| Colorectal cancer                 | 153-154                                                                                                                                                                                                                                                                                         |
| Constipation                      | 564.00, 564.09, 560.32                                                                                                                                                                                                                                                                          |
| Diarrhea                          | 009.2, 009.3, 564.5, 787.91                                                                                                                                                                                                                                                                     |
| Diverticulitis without hemorrhage | 562.11                                                                                                                                                                                                                                                                                          |
| Dysphagia                         | 787.2                                                                                                                                                                                                                                                                                           |
| Eating Disorders                  | 307.51, 307.1, 783.0, 307.50, 307.59                                                                                                                                                                                                                                                            |
| Foreign body in intestinal tract  | 935.1-938                                                                                                                                                                                                                                                                                       |
| Functional/motility disorders     | 530.0, 530.5, 536.2, 536.3, 536.8, 536.9, 564, 306.4                                                                                                                                                                                                                                            |
| Gastritis/duodenitis              | 535.00, 535.10, 535.20, 535.30, 535.40, 535.50, 535.60, 535.70                                                                                                                                                                                                                                  |
| Gastroesophageal reflux           | 530.81, 530.11, 787.1                                                                                                                                                                                                                                                                           |
| Gastrointestinal hemorrhage       | 456.0, 456.20, 530.21, 530.7, 530.82, 531.0, 531.2, 531.4, 531.6, 532.0, 532.2, 532.4, 532.6, 533.0, 533.2, 533.4, 533.6, 534.0, 534.2, 534.4, 534.6, 535.01, 535.11, 535.21, 535.31, 535.41, 535.51, 535.61, 535.71, 537.83, 562.02, 562.03, 562.12, 562.13, 569.85, 569.86, 569.3, 578, 772.4 |
| Lower GI bleeding                 | 562.02, 562.03, 562.12, 562.13, 569.85, 569.3, 578.1                                                                                                                                                                                                                                            |
| Upper GI bleeding                 | 456.0, 456.20, 530.21, 530.7, 530.82, 531.0, 531.2, 531.4, 531.6, 532.0, 532.2, 532.4, 532.6, 533.0, 533.2, 533.4, 533.6, 534.0, 534.2, 534.4, 534.6, 535.01, 535.11, 535.21, 535.31, 535.41, 535.51, 535.61, 535.71, 537.83, 569.86, 578.0                                                     |
| Gastrointestinal infection        | 001, 002, 003, 004, 005, 006, 007, 009, 008.00-008.44, 008.46-008.8                                                                                                                                                                                                                             |
| GI disorders during pregnancy     | 643, 646.7                                                                                                                                                                                                                                                                                      |
| Inflammatory bowel diseases       | 555, 556                                                                                                                                                                                                                                                                                        |

|                                       |                                                    |
|---------------------------------------|----------------------------------------------------|
| Crohn's disease                       | 555                                                |
| Ulcerative colitis                    | 556                                                |
| Intestinal obstruction                | 560.9, 560.89, 560.81                              |
| Liver disease and viral hepatitis     | 070, 570-573, 789.5, 789.59, 567.23, 456.1, 456.21 |
| Acute liver failure                   | 570                                                |
| Alcoholic liver disease               | 571.0-3                                            |
| Ascites or SBP                        | 789.5, 567.23                                      |
| Hepatic encephalopathy                | 572.2                                              |
| Hepatitis B                           | 070.2, 070.3                                       |
| Hepatitis C                           | 070.7, 070.41, 070.44, 070.51, 070.54              |
| Nausea and vomiting                   | 787                                                |
| Noninfectious gastroenteritis/colitis | 558.9                                              |
| Obesity                               | 278.00, 278.01                                     |

<sup>a</sup>ICD-9-CM: International Classification of Diseases, 9<sup>th</sup> edition, Clinical Modification

GI: gastrointestinal; SBP: Spontaneous Bacterial Peritonitis

ICD codes used to identify specific diagnoses for **Table 5**.

| <b>Principle Diagnosis for Index Hospitalization</b> | <b>ICD-9 Codes</b>                                                                                                                                                                                                                                                                                | <b>ICD-10 Codes</b>                                                                                                                                                                                                                                                |
|------------------------------------------------------|---------------------------------------------------------------------------------------------------------------------------------------------------------------------------------------------------------------------------------------------------------------------------------------------------|--------------------------------------------------------------------------------------------------------------------------------------------------------------------------------------------------------------------------------------------------------------------|
| Inflammatory Bowel Disease                           | 555, 556                                                                                                                                                                                                                                                                                          |                                                                                                                                                                                                                                                                    |
| Crohn's Disease                                      | 555                                                                                                                                                                                                                                                                                               | K50                                                                                                                                                                                                                                                                |
| Ulcerative Colitis                                   | 556                                                                                                                                                                                                                                                                                               | K51                                                                                                                                                                                                                                                                |
| GI Bleeding                                          | 456.0, 456.20, 530.21, 530.7, 530.82, 531.0, 531.2, 531.4, 531.6, 532.0, 532.2, 532.4, 532.6, 533.0, 533.2, 533.4, 533.6, 534.0, 534.2, 534.4, 534.6, 535.01, 535.11, 535.21, 535.31, 535.41, 535.51, 535.61, 535.71, 537.83, 562.02, 562.03, 562.12, 562.13, 569.85, 569.86, 569.3, 578.0, 578.1 | I85.01, K22.11, K22.6, K25.1, K25.2, K25.4, K25.6, K26.0, K26.2, K26.4, K26.6, K27.0, K27.2, K27.4, K28.0, K28.2, K28.4, K28.6, K31.811, K57.11, K57.13, K57.31, K57.91, K55.21, K31.82, K63.81, K62.5, K92.2                                                      |
|                                                      | 456.0, 456.20, 530.21, 530.7, 530.82, 531.0, 531.2, 531.4, 531.6, 532.0, 532.2, 532.4, 532.6, 533.0, 533.2, 533.4, 533.6, 534.0, 534.2, 534.4, 534.6, 535.01, 535.11, 535.21, 535.31, 535.41, 535.51, 535.61, 535.71, 537.83, 569.86, 578.0                                                       | I85.01, I85.11, K22.11, K22.6, K22.8, K25.0, K25.2, K25.4, K25.6, K25.9, K26.0, K26.2, K26.4, K26.6, K27.0, K27.2, K27.4, K27.6, K28.0, K28.2, K28.4, K28.6, K29.01, K29.41, K29.51, K29.61, K29.21, K29.71, K29.91, K29.81, K31.811, K31.82, K63.81, K92.0, K92.2 |
|                                                      | 562.02, 562.03, 562.12, 562.13, 569.85, 569.3, 578.1                                                                                                                                                                                                                                              | K55.21, K57.11, K57.13, K57.31, K57.33, K57.91, K62.5, K92.1                                                                                                                                                                                                       |

|                                           |                                                                                                                                                                       |                                                                          |
|-------------------------------------------|-----------------------------------------------------------------------------------------------------------------------------------------------------------------------|--------------------------------------------------------------------------|
| Cholelithiasis & Cholecystitis            | 574, 575.0, 575.1, 575.2                                                                                                                                              | K80, K81                                                                 |
| Pancreatitis                              | 577                                                                                                                                                                   | K85                                                                      |
|                                           | 577.0                                                                                                                                                                 | K85                                                                      |
|                                           | 577.1                                                                                                                                                                 | K86.0, K86.1                                                             |
| Intestinal Obstruction                    | 560.81, 560.89, 560.9                                                                                                                                                 | K56.5, K56.6, K56.69                                                     |
| Appendicitis                              | 540, 541, 542                                                                                                                                                         | K35, K36, K37                                                            |
|                                           |                                                                                                                                                                       |                                                                          |
| HCV                                       | 070.41, 070.7, 070.44, 070.51, 070.54                                                                                                                                 | B17.1, B18.2                                                             |
| HBV                                       | 070.2, 070.3                                                                                                                                                          | B16, B18.0, B18.1,                                                       |
| Ascites or SBP                            | 789.5, 789.59, 567.23                                                                                                                                                 | R18, R18.0, R18.8, K65.2                                                 |
| Hepatic Encephalopathy                    | 572.2                                                                                                                                                                 | K72                                                                      |
| Diverticulitis                            | 562.11                                                                                                                                                                | K57.32, K57.92                                                           |
| Noninfectious gastroenteritis and colitis | 558.9                                                                                                                                                                 | K52.89, K52.9                                                            |
| Obesity                                   | 278.00, 278.01                                                                                                                                                        | E66.0, E66.1, E66.2, E66.01, E66.09, E66.8, E66.9                        |
| C.diff                                    | 8.45                                                                                                                                                                  | A04.7                                                                    |
| GI Infections                             | 001, 002, 003, 004, 005, 006, 007, 009, 008.0, 008.1, 008.2, 008.3, 008.40, 008.41, 008.42, 008.43, 008.44, 008.46, 008.47, 008.49, 008.5, 008.6, 008.8, 009.2, 009.3 | A00, A01, A02.0, A03, A04.0-A04.6, A04.8, A04.9, A05, A06, A07, A09, A08 |
| Abdominal Pain                            | 789.00-789.09, 789.6-789.7                                                                                                                                            | R10                                                                      |
| Nausea & Vomiting                         | 787.0                                                                                                                                                                 | R11                                                                      |
| Constipation                              | 564.00, 564.09, 560.32                                                                                                                                                | K59.0                                                                    |

|                                     |                                                                                                               |                                                                   |
|-------------------------------------|---------------------------------------------------------------------------------------------------------------|-------------------------------------------------------------------|
| Gastritis                           | 535.00, 535.10, 535.20, 535.30,<br>535.40, 535.50, 535.60, 535.70                                             | K29.00, K29.20, K29.30, K29.40,<br>K29.50, K29.60, K29.70, K52.81 |
| Diarrhea                            | 564.5, 787.91                                                                                                 | R19.7, K59.1                                                      |
| GERD                                | 530.81, 530.11, 787.1                                                                                         | K21                                                               |
| Dysphagia                           | 787.2                                                                                                         | R13.1                                                             |
| Eating Disorder                     | 307.51, 307.59, 307.50, 307.1                                                                                 | F50.2, F50.8, F50.9, F50.0                                        |
| Hemorrhoids                         | 455                                                                                                           | K64.8, K64.4, K64.5, K64.9                                        |
| Celiac Disease                      | 579.0                                                                                                         | K90.0                                                             |
| Barrett's                           | 530.85                                                                                                        | K22.7                                                             |
| Other Viral<br>Hepatitis            |                                                                                                               | B17, B18, B19                                                     |
| Functional<br>Motility<br>Disorders | 536.9, 306.4, 564                                                                                             | K59.8, k59.9                                                      |
| Achalasia                           | 530                                                                                                           | K22.0                                                             |
| Esophageal<br>Dyskinesia            | 530.5                                                                                                         | K22.4                                                             |
| Persistent<br>Vomiting              | 536.2                                                                                                         | R11                                                               |
| Gastroparesis                       | 536.3                                                                                                         | K31.84                                                            |
| Dyspepsia                           | 536.8                                                                                                         | K30                                                               |
| Chronic Liver<br>Disease            | 571.4, 571.6, 571.5, 571.8, 571.9,<br>572.0, 572.1, 572.3, 572.4, 572.8,<br>573, 456.1, 456.21, K70, K74, K75 |                                                                   |
| Other Liver<br>disease              | 070.0, 070.1, 070.52, 070.53, 070.9,<br>570                                                                   |                                                                   |
| <b>When analyzed<br/>by Group</b>   |                                                                                                               |                                                                   |

|                                        |                                                                                                                                                |  |
|----------------------------------------|------------------------------------------------------------------------------------------------------------------------------------------------|--|
| Functional GI/Motility Disorders group | 536.9, 306.4, K59.9, K59.8, achalasia, dyskinesia, persistent vomiting, gastroparesis, dyspepsia                                               |  |
| Liver Disease                          | Chronic Liver Disease, Other Liver disease, HBV, HCV, Alcoholic liver diseases, Ascites and SBP, Hepatic Encephalopathy, other Viral hepatitis |  |



ICD-10 codes used to identify specific diagnoses for **Table 8**.

- (K70.0-K70.9) Alcoholic liver disease
- (K74.0-K74.6) Hepatic fibrosis/cirrhosis (all-cause)
- (K92.2) Gastrointestinal hemorrhage, unspecified
- (K55.0-K55.9) Vascular disorders of the Intestine
- (A04.7) Clostridium difficile colitis
- (K56.0-K56.7) Paralytic ileus and intestinal obstruction
- (B18.2) Chronic hepatitis C
- (K72.0-K72.9) Hepatic failure (acute and chronic)
- (K25-K28) Ulcers (gastric/duodenal/peptic)
- (K85.0-K85.9) Acute pancreatitis
- (K57.0-K57.9) Diverticular disease
- (K63.1) Perforation of intestine (non-traumatic)
- (K81.0-K81.9) Cholecystitis
- (K76.0) Fatty change of liver-not elsewhere specified
- (K83.0) Cholangitis

Clinical classification categories for **Table 12**.

These clinical classification categories were generated using Clinical Classification Software provided on the Healthcare Cost and Utilization Project (HCUP) website. For each clinical classification category, one or more ICD-9-CM and/or V code is listed.

Hepatitis

0700 0701 0702 07020 07021 07022 07023 0703 07030 07031 07032 07033  
0704 07041 07042 07043 07044 07049 0705 07051 07052 07053 07054 07059  
0706 07070 07071 0709 07271 57140 57141 57142 57149 5731 5732 5733

Intestinal infection

0010 0011 0019 0020 0021 0022 0023 0029 0030 00320 00329 0038  
0039 0040 0041 0042 0043 0048 0049 0050 0051 0052 0053 0054  
0058 00581 00589 0059 0060 0061 0062 0063 0064 0065 0066 0068  
0069 0070 0071 0072 0073 0074 0075 0078 0079 0080 00800 00801  
00802 00803 00804 00809 0081 0082 0083 00841 00842 00843 00844 00845  
00846 00847 00849 0085 0086 00861 00862 00863 00864 00865 00866 00867  
00869 0088 0090 0091 0092 0093 0211 0222

Cancer of colon

1530 1531 1532 1533 1534 1535 1536 1537 1538 1539 1590 20910  
20911 20912 20913 20914 20915 20916 2303 V1005

Cancer of other GI organs; peritoneum

1520 1521 1522 1523 1528 1529 1560 1561 1562 1568 1569 1580  
1588 1589 1591 1598 1599 20900 20901 20902 20903 2307 2309 V1000  
V1009

Esophageal disorders

4561 45621 5300 5301 53010 53011 53012 53019 5302 53020 53021 5303  
5304 5305 5306 5308 53081 53083 53084 53085 53089 5309

Gastritis and duodenitis

5350 53500 53501 5351 53510 53511 5352 53520 53521 5353 5354 53540  
53541 5355 53550 53551 5356 53560 53561 53571

Gastroduodenal ulcer (except hemorrhage)

53110 53111 53130 53131 53150 53151 53170 53171 53190 53191 53210 53211  
53230 53231 53250 53251 53270 53271 53290 53291 53310 53311 53330 53331  
53350 53351 53370 53371 53390 53391 53410 53411 53430 53431 53450 53451  
53470 53471 53490 53491 V1271

Other disorders of stomach and duodenum

5360 5361 5362 5363 5368 5369 5370 5371 5372 5373 5374 5375  
5376 53781 53782 53783 53784 53789 5379

Appendicitis and other appendiceal conditions

5400 5401 5409 541 542 5430 5439

Abdominal hernia

55000 55001 55002 55003 55010 55011 55012 55013 55090 55091 55092 55093  
55100 55101 55102 55103 5511 55120 55121 55129 5513 5518 5519 55200  
55201 55202 55203 5521 55220 55221 55229 5523 5528 5529 55300 55301  
55302 55303 5531 55320 55321 55329 5533 5538 5539

Regional enteritis and ulcerative colitis

5550 5551 5552 5559 556 5560 5561 5562 5563 5564 5565 5566  
5568 5569

Noninfectious gastroenteritis

55841 55842 5589

Intestinal obstruction without hernia

5600 5601 5602 56030 56031 56032 56039 56081 56089 5609

Diverticulosis and diverticulitis

56200 56201 56202 56203 56210 56211 56212 56213

Anal and rectal conditions

5646 5650 5651 566 5690 5691 5692 56941 56942 56943 56944 56949

Hemorrhoids

4550 4551 4552 4553 4554 4555 4556 4557 4558 4559

Other liver diseases

570 5715 5716 5718 5719 5720 5721 5722 5723 5724 5728 5730  
5734 5738 5739 7824 7891 7895 7904 7905 7948 V427

Biliary tract disease

57400 57401 57410 57411 57420 57421 57430 57431 57440 57441 57450 57451  
57460 57461 57470 57471 57480 57481 57490 57491 5750 5751 57510 57511  
57512 5752 5753 5754 5755 5756 5758 5759 5760 5761 5762 5763  
5764 5765 5768 5769 7933

Pancreatic disorders (not diabetes)

5770 5771 5772 5778 5779 5794

Gastrointestinal hemorrhage

4560 45620 5307 53082 53100 53101 53120 53121 53140 53141 53160 53161  
53200 53201 53220 53221 53240 53241 53260 53261 53300 53301 53320 53321  
53340 53341 53360 53361 53400 53401 53420 53421 53440 53441 53460 53461  
5693 5780 5781 5789

Nausea and vomiting

7870 78701 78702 78703

Abdominal pain

7890 78900 78901 78902 78903 78904 78905 78906 78907 78909 78960 78961  
78962 78963 78964 78965 78966 78967 78969

## Supplemental Results

**This table supplements Tables 10 and 11.**

Characteristics of GI Quality Improvement Consortium Endoscopy Sites and Persons Undergoing Endoscopic Procedures, 2014–2016

| <b>Characteristics</b>      | <b>Colonoscopy</b> | <b>Upper Endoscopy</b> |
|-----------------------------|--------------------|------------------------|
| Number of procedures        | 3,916,419          | 564,691                |
| Number of sites             | 538                | 232                    |
| Site characteristics (%)    |                    |                        |
| Type of site                |                    |                        |
| Hospital                    | 10.0               | 20.6                   |
| ASC/AEC                     | 78.9               | 73.6                   |
| Physician Office            | 3.1                | 2.9                    |
| Missing                     | 8.1                | 2.9                    |
| Teaching Status             |                    |                        |
| Teaching                    | 4.1                | 8.2                    |
| Non-Teaching                | 82.3               | 87.7                   |
| Missing                     | 13.6               | 4.0                    |
| Patient characteristics (%) |                    |                        |
| Age                         |                    |                        |
| < 20                        | 0.3                | 1.1                    |
| 20-29                       | 2.1                | 5.9                    |
| 30-39                       | 3.8                | 9.1                    |
| 40-49                       | 8.1                | 14.2                   |
| 50-59                       | 34.8               | 23.2                   |
| 60-69                       | 31.7               | 24.5                   |
| 70-79                       | 16.3               | 16.1                   |
| 80+                         | 3.0                | 6.1                    |
| Sex                         |                    |                        |
| Female                      | 54.6               | 60.4                   |
| Male                        | 45.4               | 39.6                   |
| Race                        |                    |                        |
| White                       | 65.8               | 62.3                   |

|                                           |      |      |
|-------------------------------------------|------|------|
| Black                                     | 8.8  | 7.9  |
| Asian                                     | 2.5  | 4.6  |
| American Indian or Alaska Native          | 0.5  | 0.4  |
| Native Hawaiian or Other Pacific Islander | 0.1  | 0.1  |
| Multiple                                  | 0.2  | 0.2  |
| Other                                     | 2.5  | 3.4  |
| Missing                                   | 17.0 | 18.5 |
| Declined                                  | 2.7  | 2.5  |
| Admission status                          |      |      |
| Inpatient                                 | 0.6  | 4.6  |
| Outpatient                                | 99.5 | 95.4 |
| ASA Category                              |      |      |
| ASA I                                     | 12.6 | 9.7  |
| ASA II                                    | 70.2 | 64.1 |
| ASA III                                   | 17.0 | 24.6 |
| ASA IV                                    | 0.2  | 1.5  |
| ASA V                                     | 0.0  | 0.0  |
| ASA E                                     | 0.0  | 0.0  |
| Region <sup>a</sup>                       |      |      |
| New England                               | 2.0  | 0.4  |
| Middle Atlantic                           | 18.5 | 25.6 |
| South Atlantic                            | 22.6 | 20.6 |
| East North Central                        | 12.2 | 15.1 |
| East South Central                        | 6.4  | 7.6  |
| West North Central                        | 2.8  | 3.2  |
| West South Central                        | 16.7 | 10.4 |
| Mountain                                  | 8.1  | 7.1  |
| Pacific                                   | 10.5 | 9.6  |
| Other                                     | 0.0  | 0.1  |
| Missing                                   | 0.2  | 0.3  |

<sup>a</sup>Based on patients' zip code

**This table supplements Figure 3A.**

Age-adjusted (2000 U.S. Standard Population) incidence of colorectal cancer per 100,000 persons by 10-year age group, United States Cancer Statistics, 2000 – 2014

| Year                | Age at diagnosis |       |       |       |        |        |        |
|---------------------|------------------|-------|-------|-------|--------|--------|--------|
|                     | 20-29            | 30-39 | 40-49 | 50-59 | 60-69  | 70-79  | 80+    |
| 2000                | 1.3              | 6.0   | 21.8  | 67.4  | 168.9  | 296.3  | 421.8  |
| 2001                | 1.4              | 6.1   | 21.9  | 67.5  | 163.8  | 291.8  | 411.1  |
| 2002                | 1.5              | 6.4   | 22.1  | 67.0  | 157.8  | 283.5  | 398.7  |
| 2003                | 1.4              | 6.5   | 22.2  | 67.5  | 154.9  | 275.6  | 987.7  |
| 2004                | 1.4              | 6.8   | 22.6  | 66.9  | 149.6  | 263.6  | 373.6  |
| 2005                | 1.4              | 6.7   | 22.8  | 66.6  | 144.2  | 253.6  | 636.1  |
| 2006                | 1.5              | 7.2   | 23.3  | 65.3  | 138.4  | 244.8  | 345.8  |
| 2007                | 1.5              | 7.0   | 23.8  | 65.8  | 133.6  | 236.5  | 332.4  |
| 2008                | 1.6              | 7.3   | 23.7  | 64.1  | 126.5  | 228.0  | 330.1  |
| 2009                | 1.6              | 7.2   | 24.2  | 63.2  | 120.9  | 213.4  | 304.7  |
| 2010                | 1.7              | 7.3   | 23.8  | 61.3  | 113.4  | 201.5  | 289.9  |
| 2011                | 1.7              | 7.4   | 23.8  | 60.5  | 109.9  | 196.2  | 281.6  |
| 2012                | 1.9              | 7.7   | 24.1  | 60.4  | 106.8  | 187.3  | 264.4  |
| 2013                | 1.8              | 7.5   | 24.5  | 61.9  | 104.7  | 178.6  | 257.7  |
| 2014                | 2.2              | 8.2   | 25.3  | 63.3  | 105.1  | 171.0  | 243.6  |
| Absolute difference | 0.9              | 2.2   | 3.5   | -4.1  | -63.8  | -125.3 | -178.2 |
| Relative change     | 69.2%            | 36.7% | 16.1% | -6.1% | -37.8% | -42.3% | -42.2% |

Source: United States Cancer Statistics: 1999 – 2014 Incidence and Mortality Web-based Report. Atlanta: U.S. Department of Health and Human Services, Centers for Disease Control and Prevention and National Cancer Institute; 2017. Available at: [www.cdc.gov/uscs](http://www.cdc.gov/uscs).

**This table supplements Figure 3B.**

Age-adjusted (2000 U.S. Standard Population) mortality of colorectal cancer per 100,000 persons by 10-year age group, United States Cancer Statistics, 2000 – 2014

| Year                | Age at death |       |       |        |        |        |        |
|---------------------|--------------|-------|-------|--------|--------|--------|--------|
|                     | 20-29        | 30-39 | 40-49 | 50-59  | 60-69  | 70-79  | 80+    |
| 2000                | 0.3          | 1.5   | 5.8   | 18.9   | 51.2   | 108.1  | 218.8  |
| 2001                | 0.3          | 1.7   | 6.0   | 19.5   | 50.1   | 103.3  | 210.9  |
| 2002                | 0.3          | 1.5   | 6.0   | 18.9   | 50.1   | 100.5  | 206.6  |
| 2003                | 0.3          | 1.5   | 5.6   | 17.8   | 47.7   | 98.0   | 203.3  |
| 2004                | 0.3          | 1.5   | 5.4   | 17.0   | 43.3   | 92.6   | 194.5  |
| 2005                | 0.3          | 1.5   | 5.5   | 16.5   | 42.1   | 88.6   | 190.0  |
| 2006                | 0.3          | 1.6   | 5.6   | 16.7   | 41.9   | 86.7   | 183.5  |
| 2007                | 0.3          | 1.5   | 5.8   | 17.3   | 40.8   | 83.9   | 177.6  |
| 2008                | 0.3          | 1.7   | 6.0   | 16.8   | 39.4   | 81.6   | 170.9  |
| 2009                | 0.3          | 1.6   | 5.9   | 16.6   | 37.7   | 77.6   | 163.2  |
| 2010                | 0.3          | 1.6   | 6.0   | 16.7   | 36.9   | 75.0   | 160.0  |
| 2011                | 0.3          | 1.7   | 5.8   | 17.0   | 35.8   | 73.2   | 153.0  |
| 2012                | 0.3          | 1.7   | 6.0   | 16.6   | 35.0   | 70.5   | 147.5  |
| 2013                | 0.3          | 1.8   | 6.1   | 16.7   | 34.3   | 68.1   | 145.5  |
| 2014                | 0.3          | 1.7   | 6.5   | 16.5   | 33.6   | 64.6   | 141.9  |
| Absolute difference | 0.0          | 0.2   | 0.7   | -2.4   | -17.6  | -43.5  | -76.9  |
| Relative change     | 0.0          | 13.3% | 12.1% | -12.7% | -34.4% | -40.2% | -35.1% |

Source: United States Cancer Statistics: 1999 – 2014 Incidence and Mortality Web-based Report. Atlanta: U.S. Department of Health and Human Services, Centers for Disease Control and Prevention and National Cancer Institute; 2017. Available at: [www.cdc.gov/uscs](http://www.cdc.gov/uscs).



**This table supplements Figure 5A.**

Adenomatous Polyps on Colonoscopy in Screening Only, 45-75, Average Risk Persons by Age, Sex and Race

| Age,y | Race                             | Female |               | Male   |               |
|-------|----------------------------------|--------|---------------|--------|---------------|
|       |                                  | n      | Prevalence, % | n      | Prevalence, % |
| 45-49 | White                            | 1890   | 24.80%        | 2159   | 33.48%        |
|       | Black                            | 605    | 17.64%        | 604    | 25.73%        |
|       | Asian                            | 80     | 19.75%        | 85     | 30.14%        |
|       | American Indian or Alaska Native | 10     | 13.70%        | 16     | 27.12%        |
| 50-54 | White                            | 42055  | 25.91%        | 57619  | 38.33%        |
|       | Black                            | 7173   | 23.27%        | 6920   | 32.17%        |
|       | Asian                            | 2181   | 23.45%        | 2495   | 36.44%        |
|       | American Indian or Alaska Native | 289    | 23.75%        | 322    | 31.72%        |
| 55-59 | White                            | 26672  | 29.36%        | 35,071 | 42.88%        |
|       | Black                            | 4532   | 27.89%        | 4466   | 37.86%        |
|       | Asian                            | 1317   | 26.98%        | 1438   | 39.44%        |
|       | American Indian or Alaska Native | 213    | 26.36%        | 237    | 34.20%        |
| 60-64 | White                            | 29559  | 30.00%        | 37233  | 43.09%        |
|       | Black                            | 4988   | 30.75%        | 4514   | 41.34%        |
|       | Asian                            | 1304   | 27.76%        | 1396   | 41.93%        |
|       | American Indian or Alaska Native | 214    | 23.67%        | 263    | 34.65%        |
| 65-69 | White                            | 26881  | 33.53%        | 31130  | 46.42%        |
|       | Black                            | 4096   | 34.05%        | 3523   | 46.33%        |
|       | Asian                            | 1190   | 33.54%        | 1231   | 45.73%        |
|       | American Indian or Alaska Native | 208    | 27.59%        | 236    | 34.15%        |
| 70-75 | White                            | 17513  | 35.05%        | 20354  | 47.97%        |
|       | Black                            | 2407   | 36.84%        | 1961   | 46.12%        |
|       | Asian                            | 746    | 37.47%        | 719    | 46.84%        |
|       | American Indian or Alaska Native | 140    | 28.46%        | 143    | 34.54%        |

**This table supplements Figure 5B.**

Advanced neoplasm ( $\geq 10$  mm, high grade dysplasia, villous component) on Colonoscopy in Screening Only, 45-75, Average Risk Persons by Age, Sex and Race

| Age,y | Race                             | Female |               | Male |               |
|-------|----------------------------------|--------|---------------|------|---------------|
|       |                                  | n      | Prevalence, % | n    | Prevalence, % |
| 45-49 | White                            | 251    | 2.95%         | 285  | 4.42%         |
|       | Black                            | 94     | 2.41%         | 86   | 3.66%         |
|       | Asian                            | 14     | 3.15%         | 20   | 7.09%         |
|       | American Indian or Alaska Native | 2      | 1.87%         | 0    | 0.00%         |
| 50-54 | White                            | 5890   | 3.30%         | 8233 | 5.48%         |
|       | Black                            | 949    | 2.78%         | 1000 | 4.65%         |
|       | Asian                            | 270    | 2.67%         | 296  | 4.32%         |
|       | American Indian or Alaska Native | 39     | 2.61%         | 34   | 3.35%         |
| 55-59 | White                            | 3892   | 3.91%         | 5488 | 6.71%         |
|       | Black                            | 629    | 3.49%         | 686  | 5.82%         |
|       | Asian                            | 170    | 3.17%         | 189  | 5.18%         |
|       | American Indian or Alaska Native | 22     | 2.23%         | 34   | 4.91%         |
| 60-64 | White                            | 3989   | 3.72%         | 5617 | 6.50%         |
|       | Black                            | 601    | 3.37%         | 716  | 6.56%         |
|       | Asian                            | 130    | 2.56%         | 193  | 5.80%         |
|       | American Indian or Alaska Native | 23     | 2.08%         | 27   | 3.56%         |
| 65-69 | White                            | 3828   | 4.37%         | 4823 | 7.19%         |
|       | Black                            | 541    | 4.09%         | 611  | 8.04%         |
|       | Asian                            | 158    | 4.06%         | 167  | 6.20%         |
|       | American Indian or Alaska Native | 17     | 1.78%         | 19   | 2.75%         |
| 70-75 | White                            | 2449   | 4.48%         | 3218 | 7.58%         |
|       | Black                            | 332    | 4.57%         | 326  | 7.67%         |
|       | Asian                            | 91     | 4.18%         | 90   | 5.86%         |
|       | American Indian or Alaska Native | 9      | 1.43%         | 6    | 1.45%         |

**This table supplements Figure 5C.**

Serrated polyps on Colonoscopy in Screening Only, 45-75, Average Risk Persons by Age, Sex and Race

| Age,y | Race                             | Female |               | Male |               |
|-------|----------------------------------|--------|---------------|------|---------------|
|       |                                  | n      | Prevalence, % | n    | Prevalence, % |
| 45-49 | White                            | 421    | 5.52%         | 409  | 6.34%         |
|       | Black                            | 90     | 2.62%         | 47   | 2.00%         |
|       | Asian                            | 16     | 3.95%         | 8    | 2.84%         |
|       | American Indian or Alaska Native | 0      | 0.00%         | 3    | 5.08%         |
| 50-54 | White                            | 10722  | 6.61%         | 9991 | 6.65%         |
|       | Black                            | 806    | 2.62%         | 585  | 2.72%         |
|       | Asian                            | 393    | 4.23%         | 247  | 3.61%         |
|       | American Indian or Alaska Native | 29     | 2.38%         | 42   | 4.14%         |
| 55-59 | White                            | 5925   | 6.52%         | 5294 | 6.47%         |
|       | Black                            | 424    | 2.61%         | 304  | 2.58%         |
|       | Asian                            | 184    | 3.77%         | 126  | 3.46%         |
|       | American Indian or Alaska Native | 17     | 2.10%         | 17   | 2.45%         |
| 60-64 | White                            | 6231   | 6.32%         | 5484 | 6.35%         |
|       | Black                            | 431    | 2.66%         | 272  | 2.49%         |
|       | Asian                            | 206    | 4.39%         | 147  | 4.42%         |
|       | American Indian or Alaska Native | 20     | 2.21%         | 19   | 2.50%         |
| 65-69 | White                            | 4924   | 6.14%         | 4182 | 6.24%         |
|       | Black                            | 299    | 2.49%         | 179  | 2.35%         |
|       | Asian                            | 121    | 3.41%         | 107  | 3.97%         |
|       | American Indian or Alaska Native | 10     | 1.33%         | 16   | 2.32%         |
| 70-75 | White                            | 3104   | 6.21%         | 2555 | 6.02%         |
|       | Black                            | 150    | 2.30%         | 103  | 2.42%         |
|       | Asian                            | 61     | 3.06%         | 59   | 3.84%         |
|       | American Indian or Alaska Native | 7      | 1.42%         | 7    | 1.69%         |

**This table supplements Figure 5D**

Adenocarcinoma on Colonoscopy in Screening Only, 45-75, Average Risk Persons by Age, Sex and Race

| Age,y | Race                             | Female |               | Male |               |
|-------|----------------------------------|--------|---------------|------|---------------|
|       |                                  | n      | Prevalence, % | n    | Prevalence, % |
| 45-49 | White                            | 26     | 0.34%         | 28   | 0.43%         |
|       | Black                            | 8      | 0.23%         | 5    | 0.21%         |
|       | Asian                            | 1      | 0.25%         | 2    | 0.71%         |
|       | American Indian or Alaska Native | 0      | 0.00%         | 0    | 0.00%         |
| 50-54 | White                            | 398    | 0.25%         | 464  | 0.31%         |
|       | Black                            | 71     | 0.23%         | 80   | 0.37%         |
|       | Asian                            | 12     | 0.13%         | 18   | 0.26%         |
|       | American Indian or Alaska Native | 2      | 0.16%         | 4    | 0.39%         |
| 55-59 | White                            | 294    | 0.32%         | 373  | 0.46%         |
|       | Black                            | 58     | 0.36%         | 75   | 0.64%         |
|       | Asian                            | 11     | 0.23%         | 17   | 0.47%         |
|       | American Indian or Alaska Native | 0      | 0.00%         | 7    | 1.01%         |
| 60-64 | White                            | 311    | 0.32%         | 425  | 0.49%         |
|       | Black                            | 62     | 0.38%         | 57   | 0.52%         |
|       | Asian                            | 16     | 0.34%         | 14   | 0.42%         |
|       | American Indian or Alaska Native | 3      | 0.33%         | 5    | 0.66%         |
| 65-69 | White                            | 289    | 0.36%         | 386  | 0.58%         |
|       | Black                            | 65     | 0.54%         | 50   | 0.66%         |
|       | Asian                            | 11     | 0.31%         | 7    | 0.26%         |
|       | American Indian or Alaska Native | 2      | 0.27%         | 1    | 0.14%         |
| 70-75 | White                            | 212    | 0.42%         | 294  | 0.69%         |
|       | Black                            | 33     | 0.51%         | 41   | 0.96%         |
|       | Asian                            | 10     | 0.50%         | 16   | 1.04%         |
|       | American Indian or Alaska Native | 2      | 0.41%         | 1    | 0.24%         |
